# Supplementary material
Source: publisher figshare collection journal article supplement (https://sage.figshare.com/ndownloader/files/17771324)
Supplement: Supplementary file 1 [file 17771324]

Supplementary File 3. The healthcare cost of malnutrition in relation to the national health expenditure

|                                                              | Healthcare<br>Cost<br>(billion) | National Healthcare<br>Expenditure<br>(percentage) |
|--------------------------------------------------------------|---------------------------------|----------------------------------------------------|
| National healthcare expenditure                              | \$338.9                         | 100.0%                                             |
| Healthcare cost for patients with SDM                        | \$14.5                          | 4.3%                                               |
| Excess cost for patients with SDM                            | \$9.7                           | 2.9%                                               |
| Healthcare cost for patients with SDM plus<br>those with DAM | \$24.9                          | 7.3%                                               |
| Excess cost for patients with SDM plus those<br>with DAM     | \$11.0                          | 3.2%                                               |

DAM: disease-associated malnutrition; SDM: strictly-diagnosed malnutrition; \$1 = 108.75

Japanese yen, as of February 2018.
